# Supplementary material for: Evaluation of Multidrug-Resistant P. aeruginosa in Healthcare Facility Water Systems
Source: MDPI journal article supplement (doi:10.3390/antibiotics10121500), 2021-12-07

**Figure S1.** *P. aeruginosa* antibiotic resistant isolates and total of *P. aeruginosa* isolates in the years of observation.

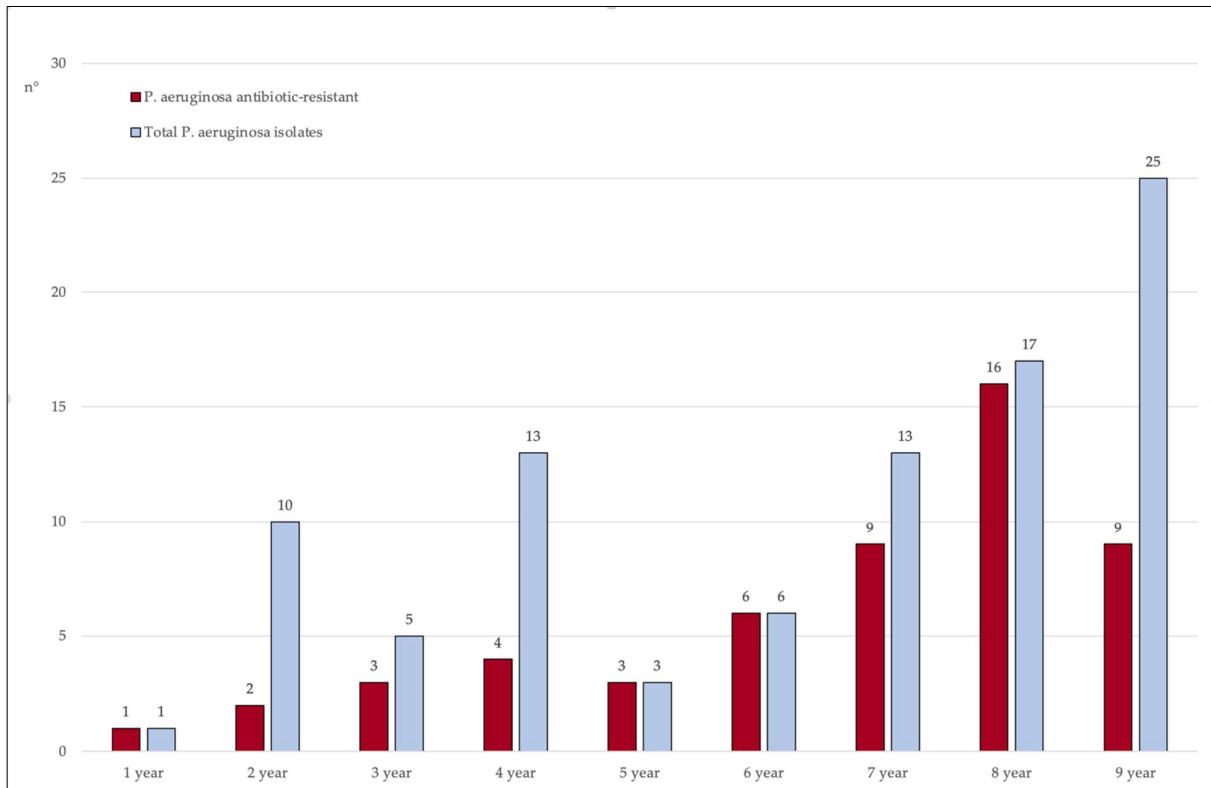

Supplement: s1 [file s1]
